# Supplementary material for: Transcriptome Mining Provides Insights into Cell Wall Metabolism and Fiber Lignification in Agave tequilana Weber
Source: MDPI journal article supplement (doi:10.3390/plants11111496), 2022-06-02
Supplement: s1 [file s1]

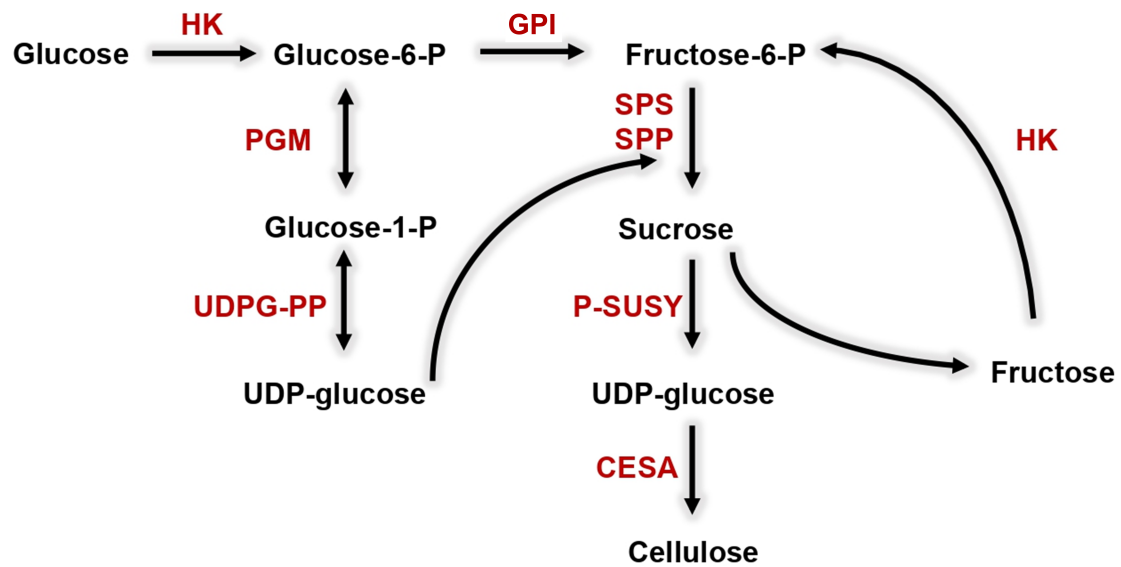

**Figure S1.** Biosynthetic pathway for cellulose in plants. SUCROSE PHOSPHATE SYNTHASE (SPS), SUCROSE PHOSPHATE PHOSPHATASE (SPP), FRUCTOKINASE (FK), PHOSPHOGLUCOMUTASE (PGM), GLUCOSE-6-PHOSPHATE ISOMERASE (GPI), SUCROSE SYNTHASE (SUS), HEXOKINASE (HXK), UDP-GLUCOSE PYROPHOSPHORYLASE (UGP) AND CELLULOSE SYNTHASE (CESA).

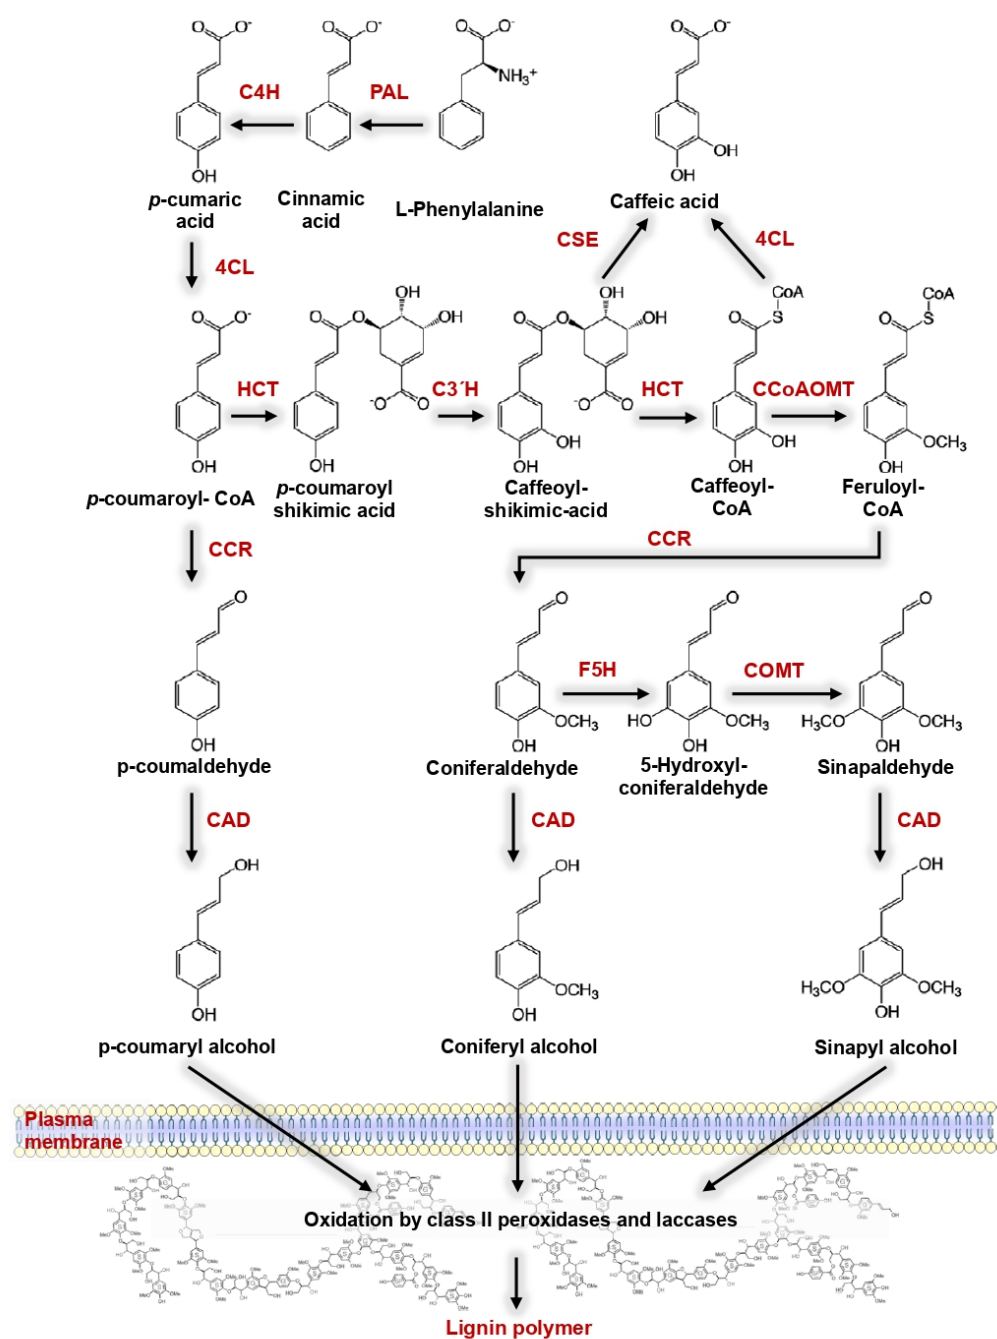

**Figure S2.** Biosynthetic pathway for lignin in plants. L-PHENYLALANINE AMMONIA-LYASE (PAL), CINNAMIC ACID 4-HYDROXYLASE (C4H), 4-HYDROXYCINNAMATE COA LIGASE (4CL), CAFFEYOYL SHIKIMATE ESTERASE (CSE), HYDROXYCINNAMOYL COA: SHIKIMATE HYDROXYCINNAMOYL TRANSFERASE (HCT), COUMARATE 3-HYDROXYLASE (C3H), CAFFEYOYL COA 3-O-METHYLTRANSFERASE (CCoAOMT), CINNAMOYL COA REDUCTASE (CRR), FERULIC ACID/CONIFERALDEHYDE 5-HYDROXYLASE (F5H), CAFFEIC ACID 3-O-METHYLTRANSFERASE (COMT) and CINNAMYL ALCOHOL DEHYDROGENASE (CAD).



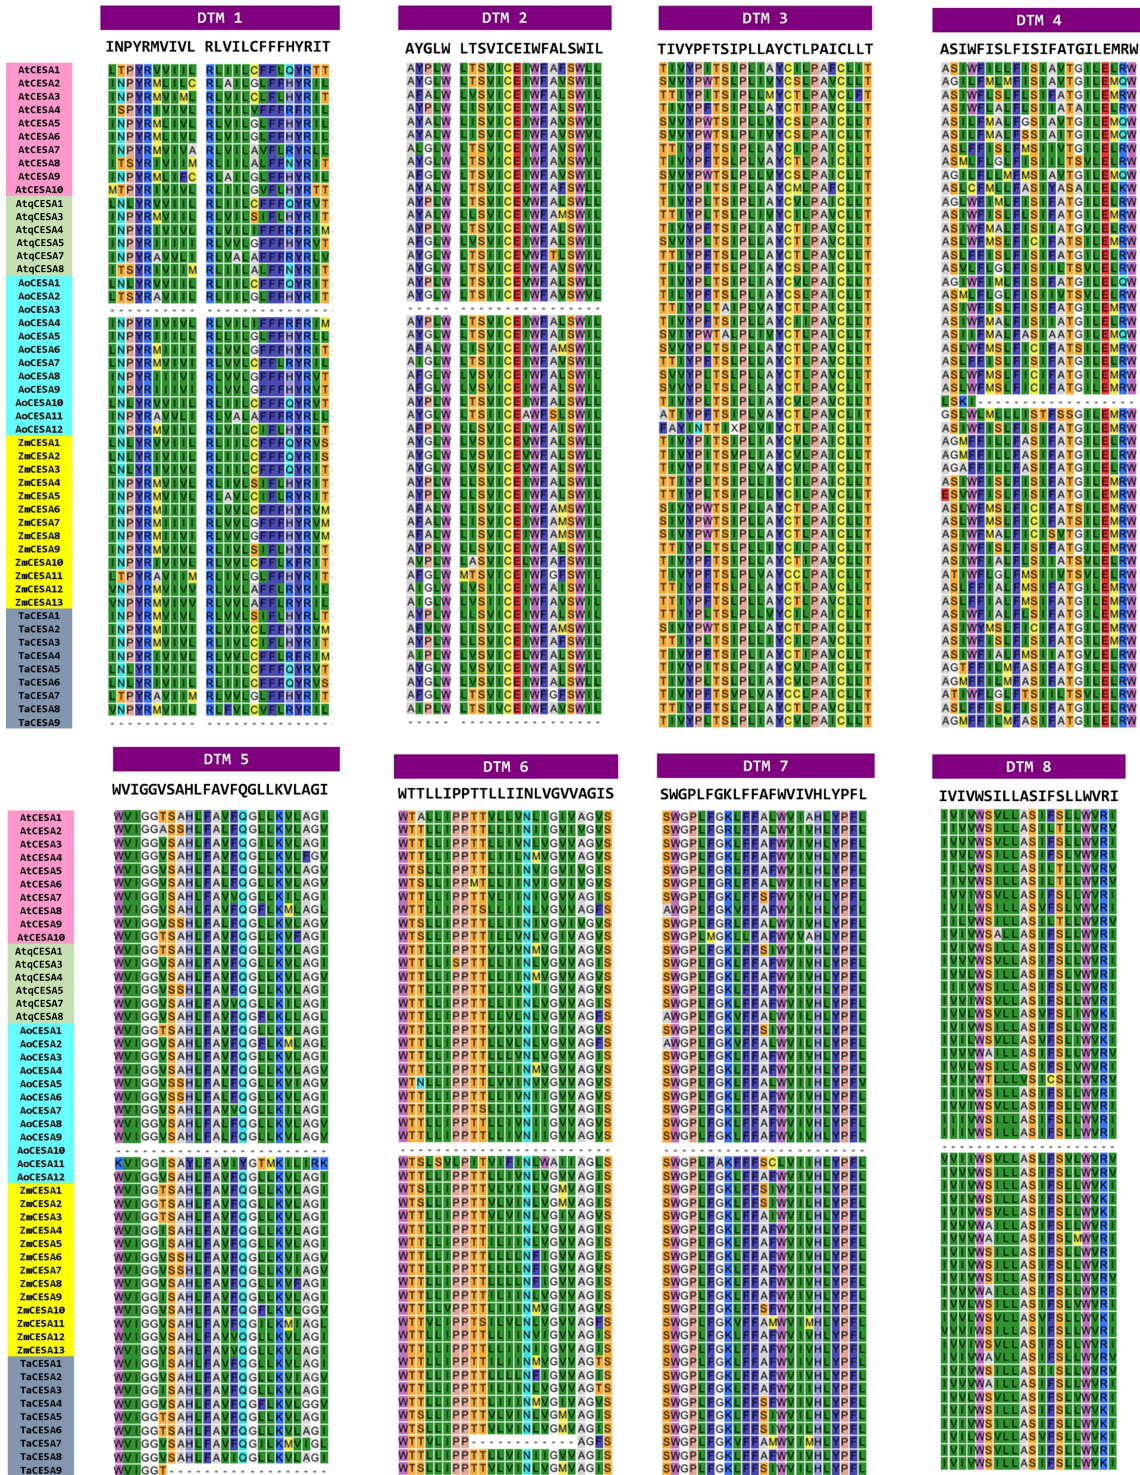

**Figure S3.** AtqCESA proteins have conserved transmembrane domains. Eight transmembrane domains (TMD) previously characterized in *A. thaliana* (AtCESA) were found to be conserved in *A. tequilana* (AtqCESA) respect to other species analyzed. *A. officinalis* (AoCESA), *Z. mays* (ZmCESA), *T. aestivum* (TaCESA). Consensus residues are indicated for each TMD.

|         | 20                                                                                                                | 40    | 60    | 80    | 100   |                                                                       |
|---------|-------------------------------------------------------------------------------------------------------------------|-------|-------|-------|-------|-----------------------------------------------------------------------|
| AtCAD1  | -----                                                                                                             | ----- | ----- | ----- | ----- | MSSSESVENECMCAARDPSGLLSPHTITRRSVTTDDVSLTITHCGVCYADVIISRN 57           |
| AtCAD2  | -----                                                                                                             | ----- | ----- | ----- | ----- | MVDQNKAFGWAANDESGVLSPFHFSRRENGENDVTVKILFCGVCHSDLHTIKN 53              |
| AtCAD3  | -----                                                                                                             | ----- | ----- | ----- | ----- | MVDQNRADFWAANDESGVLSPFHFSRRENGENDVTVKILFCGVCHSDLHTIKN 53              |
| AtCAD4  | -----                                                                                                             | ----- | ----- | ----- | ----- | MGSVEAGEKKALGWAARDPSGVLSPYSYTLRSTGADDVYIKVICCGICHTDIHQIKN 57          |
| AtCAD5  | -----                                                                                                             | ----- | ----- | ----- | ----- | MGIMEAERKTTGWAARDPSGILSPYTYTLRETGPENVRIRIICCGICHTDLHQTKN 56           |
| AtCAD6  | -----                                                                                                             | ----- | ----- | ----- | ----- | MERLSGEKEQSVEAFGWAARDSSGHLSPFVFSRRKTGEEEVNRVKVLYCGICHSDLHCLKN 60      |
| AtCAD7  | -----                                                                                                             | ----- | ----- | ----- | ----- | MGKVLKEAFGLAAKDESGILSPFSFRRATGEKDVRFKVLFCGICHTDLSMAKN 55              |
| AtCAD8  | -----                                                                                                             | ----- | ----- | ----- | ----- | MGKVLQKEAFGLAAKDN SGVLSPFSTTRRETGEKDVRFKVLFCGICHSDLHMVKN 55           |
| AtCAD9  | -----                                                                                                             | ----- | ----- | ----- | ----- | MAKSPETEHPNKFVWGARGDSGLSPFHFSSRRDNGENDVTVKILFCGVCHTDLHTIKN 59         |
| AtqCAD1 | -----                                                                                                             | ----- | ----- | ----- | ----- | MDAESGNCLGWAARDTSGALSPYKFSRRSLGNEDISVRITHCGVCYADVIITRN 54             |
| AtqCAD2 | -----                                                                                                             | ----- | ----- | ----- | ----- | MEAKENGKQAAPAAEQRRREAVGWAARDSSGILSPFSFSSRRNNGDDVTLKIMYCGICHSDLSIKN 66 |
| AtqCAD3 | -----                                                                                                             | ----- | ----- | ----- | ----- | MAMEQEPQKAIGWAAKDSGVSPFSFTRRANGDHDVTIRILYCGICHTDLHYAKN 56             |
| AtqCAD4 | -----                                                                                                             | ----- | ----- | ----- | ----- | MAELHTAFGWAARDATGILSPFNSTRAIGDNDVTLKILYCGICHTDLHTIKN 53               |
| AtqCAD5 | -----                                                                                                             | ----- | ----- | ----- | ----- | MGSVASERTVTGWAAKDASGVLSPYTYSLRPTGAEDVVVKVLYCGVCHTDLHQTRN 56           |
| AtqCAD6 | -----                                                                                                             | ----- | ----- | ----- | ----- | MVVAANGTKASSPETEHPKAFGWAARDSSGVLSPFTFSRRNNGDDVTLKILYCGICHSDLHTIKN 67  |
| AtqCAD7 | -----                                                                                                             | ----- | ----- | ----- | ----- | MDTKSGNGDCLGWAARDVSGVLSPYKFSRRVVGSDVSLKITHCGVCYADVIITRN 56            |
| ZmCAD1  | -----                                                                                                             | ----- | ----- | ----- | ----- | MAPVEAEQHRRRALALAHDASGAVSPIRISRRDTGDDVAIQILYCGICHSDLHTIKN 59          |
| ZmCAD2  | -----                                                                                                             | ----- | ----- | ----- | ----- | MAAESENGNCCKAWAARDPSGVLSPHSFNRRRAVQSGDVSLLKIIYCGVCYADVAITRN 56        |
| ZmCAD3  | -----                                                                                                             | ----- | ----- | ----- | ----- | MGSLASERKVVGWAARDATGHLSPYSYTLRNTGPEDVVVKVLYCGICHTDLHQAKN 56           |
| ZmCAD4  | MSYHCRVLPVPFHYPPGAGARVGAGAGSPFPSASRALRLPRPRASVEKREQVAAMEEQGGGAALGWAARDSSGVLSPYSFSSRRVPKDDVTIKVLYCGICHTDLHTIKN 110 |       |       |       |       |                                                                       |
| TaCAD1  | -----                                                                                                             | ----- | ----- | ----- | ----- | MGSVDASETTVTGWAARDATGHLSPYRYTLRKTGPEDVVLKVYCYGICHTDVHQVKN 57          |

|         | 120   | 140     | 160                         | 180                                              | 200                                                         | 220                                      |                                                                       |                                                 |                     |                          |         |        |     |
|---------|-------|---------|-----------------------------|--------------------------------------------------|-------------------------------------------------------------|------------------------------------------|-----------------------------------------------------------------------|-------------------------------------------------|---------------------|--------------------------|---------|--------|-----|
| AtCAD1  | QHGD  | SKYPLVP | GHEIAGIVTKVGNPVRQRFKVG      | DHVGVTYVNSCRECEYCN                               | EGQEVNCAKGVFTFNGIDHDG--SVTKGGYSSHIVH                        | ERYCYKIPVDYPLESAAPLLC                    | 164                                                                   |                                                 |                     |                          |         |        |     |
| AtCAD2  | HMGFS | RYPIIP  | GHEIVGIATKVGKNVTKFKEGDRVGV  | GIIGSCQSCESCNDLENYCPKVVFTYNSRSDG--TSR            | QGGYSDVIVVDH                                                | RFVLSIPDGLPSDSGAPLLC                     | 161                                                                   |                                                 |                     |                          |         |        |     |
| AtCAD3  | HMGFS | RYPIIP  | GHEIVGIATKVGKNVTKFKEGDRVGV  | GIIGSCQSCESCNDLENYCPKVVFTYNSRSDG--TR             | NQGGYSDVIVVDH                                               | RFVLSIPDGLPSDSGAPLLC                     | 160                                                                   |                                                 |                     |                          |         |        |     |
| AtCAD4  | DLGMS | NYPMVP  | PGHEVVG                     | EVGSDVSKFTVGDVVG                                 | VGVVGGCGSCKPCSSLEQYCNK--RINSYNDVYTDG--KPTQGGFADTMIVNQKFVVKI | PEGMAVEQAAPLLC                           | 164                                                                   |                                                 |                     |                          |         |        |     |
| AtCAD5  | DLGMS | NYPMVP  | PGHEVVG                     | EVGSDVSKFTVGDVVG                                 | VGVVGGCGSCKPCERDLEQYCPK--KINSYNDVYING--QPTQGGFAKATVVHQFVVKI | PEGMAVEQAAPLLC                           | 163                                                                   |                                                 |                     |                          |         |        |     |
| AtCAD6  | EWHS  | SIYPLVP | GHEI                        | GEVSEIGNKVS                                      | KNLGD                                                       | KVGVGCI                                  | VDSCRTCESCREQENYCTK--AIATYNGVHHDG--TINYGGYSDHIVDERYAVKIPHTLPLVSAAPLLC | 167                                             |                     |                          |         |        |     |
| AtCAD7  | EWGL  | TTYPLVP | GHEIVGV                     | TEVGA                                            | KVKFNAGDKVGV                                                | GMAGSC                                   | RCSDCNDG                                                              | ENYCPK--MILTS                                   | GAKNFDD--TMTGGYSDH  | MVCAEDFIIRIPDNPLDGAAPLLC | 162     |        |     |
| AtCAD8  | EWGM  | STYPLVP | GHEIVGV                     | TEVGA                                            | KVKFKTGEK                                                   | VGVGLVSS                                 | CGSCDSCTEGMENYCPK--SIQTYGFPYYDN--TITYGGYSDH                           | MVCEEGFVIRIPDNPLDAAAPLLC                        | 162                 |                          |         |        |     |
| AtCAD9  | DWGS  | YYPVVP  | PGHEIVGIATKVGKNVTKFKEGDRVGV | GISGSCQSCESCNDLENYCPQ--MSFTYNAIGSDG--TK--NYGGYSE | NIIVDQRFVLRFPENLPSDSGAPLLC                                  |                                          | 166                                                                   |                                                 |                     |                          |         |        |     |
| AtqCAD1 | KVGDS | NYPLVP  | GHEIVGV                     | TFG                                              | SNVRQRFKVG                                                  | DHVG                                     | VGYAVNSCRDCQYCN                                                       | EQLEVYCSKGITFTFNAPDSG--TFTKGGYSSYIVVHNR         | YCYKIPDGYPLAKAAPLLC | 162                      |         |        |     |
| AtqCAD2 | DWGT  | TRYPLV  | AGHEIAGIVTEVGNVQKFKIGDKVGV  | GVGIVGSCRCSCQSCQDLENYCPN--LI                     | FTYNSIDNDG--TVTYGGYSNMLVNEHF                                | AVKFPDNPLD                               | KGAPLLC                                                               | 173                                             |                     |                          |         |        |     |
| AtqCAD3 | DHGF  | SLYPIVP | GHEIMGEVTRIGSKVKFKVGD       | KVGVGCLVVRTCGECENC                               | RGDLECYCPK--PVYTYNSVDHDG--SVTYGGYSNQI                       | VDEHYAIRVPHNPLD                          | SAAPLLC                                                               | 163                                             |                     |                          |         |        |     |
| AtqCAD4 | DFGIS | MPVVP   | PGHEIVGV                    | TEAGNR                                           | VRKFRKRGDKIGV                                               | GMVGS                                    | SACDCAQGFENYCPK--IVPTNSGIRSDG--TITYGGFADKL                            | VVDEHF                                          | AVRLPENL            | DLDKAAPLLC               | 160     |        |     |
| AtqCAD5 | HLGMS | NYPMVP  | PGHEVVG                     | EVGSGV                                           | GKCRVGDVVG                                                  | AGCIVGCC                                 | RECGPC                                                                | KANIEQYCSK--KINSYNDVYTDG--KPTMGGFASAMVVDQKFVVKI | PAGLAPEQAAPLLC      | 163                      |         |        |     |
| AtqCAD6 | EWQNT | SYPVVP  | PGHEIVGV                    | TEVGS                                            | NVNVKFKVGD                                                  | KVIGICMVES                               | CRSCDSCNQHL                                                           | ENYCPK--IIFTYNSINKD--TKTYGGYS                   | DMIVNEHFVVKFENMPLD  | KGAPLLC                  | 174     |        |     |
| AtqCAD7 | KFGDS | NYPLVP  | GHEIVGV                     | IEGS                                             | NVHKFKVGD                                                   | HVGVTYVNS                                | CRDCENCNE                                                             | YQETHCSK--ITSTYNSLDLDG--TFTKGGFSNYI             | IVHD                | RYCYKIPVGYPLAMAAPLLC     | 163     |        |     |
| ZmCAD1  | EWKN  | NANYPV  | VPGHEIAGLITEVGNV            | KFRFNVGD                                         | KVGVGCMVNTCQSC                                              | ESCEGGHENYCSK--IIFTYNSH                  | DRD--TVTYGGYS                                                         | DMVVNERFVIRF                                    | PDGMPLDRGAPLLC      | 166                      |         |        |     |
| ZmCAD2  | KLND  | SKYPLVP | GHEIAGVVTQVGADV             | KGKFKVGD                                         | HVGVTYVNS                                                   | CRDCENCNISLDNHCPK--AVYTFNGIDTDG--TVTKGGY | STHIVH                                                                | ERYCFKIPDGYPLAKAAPLLC                           | 163                 |                          |         |        |     |
| ZmCAD3  | HLGAS | KYPMVP  | PGHEVVG                     | EVGPEVAKYGVGD                                    | VVGVI                                                       | VGCCRE                                   | CSPCANVEQYCNK--KINSYNDVYTDG--RPTQGGFASAMVVDQKFVVKI                    | PAGLAPEQAAPLLC                                  | 163                 |                          |         |        |     |
| ZmCAD4  | DWRN  | AMYPVVP | PGHEIVGV                    | TVGGGV                                           | TRFKAGD                                                     | TVGVGVFVGS                               | CRSCDSCGK                                                             | GDDNYCAG--IVLTSNGVD                             | HAHGGAPTRGGFSDVL    | VASEHYVVRP               | DGLALDR | TAPLLC | 219 |
| TaCAD1  | DLGAS | KYPMVP  | PGHEVVG                     | EVGPEVSKFRAGD                                    | VVGVI                                                       | VGCCRC                                   | CRCPKANVEQYCNK--KINSYNDVYTDG--KPTQGGFASAMVVDQKFVVKI                   | PAGLAPEQAAPLLC                                  | 164                 |                          |         |        |     |

|         | 240           | 260           | 280           | 300            | 320                 |                       |                  |                           |              |              |               |                 |          |
|---------|---------------|---------------|---------------|----------------|---------------------|-----------------------|------------------|---------------------------|--------------|--------------|---------------|-----------------|----------|
| AtCAD1  | AGITVYAPMMRHN | MN--QPGKSLG   | VIGLGLGLGHMAV | KFGKAFGLSVTVF  | STSISKKEEALNLLGAENF | VISSDHDQMKALEKSLDFLVD | TASGDHAFDPYMSLLK | IAGTYV 273                |              |              |               |                 |          |
| AtCAD2  | AGITVYSPMKYYG | MTKESGKRLGVN  | GLGLGHI       | IAVKIGKAFGLRVT | VISRSSEKERE         | AIDRLGADSF            | LVTTDSQKMK       | EAVGTMDFIIDTVSAEHALLPLFSL | LKVNGKLV 271 |              |               |                 |          |
| AtCAD3  | AGITVYSPMKYYG | MTKESGKRLGVN  | GLGLGHI       | IAVKIGKAFGLRVT | VISRSSEKERE         | AIDRLGADSF            | LVTTDSQKMK       | EAVGTMDFIIDTVSAEHALLPLFSL | LKVNGKLV 270 |              |               |                 |          |
| AtCAD4  | AGVTVYSPLSHF  | GFLM--ASGLKGG | ILGLGGVGHMGVK | IAKAMGHVTVISS  | SDKKKEEAIEHLGAD     | DYVSSDPAEMQRLADS      | LDYIIDTVPVF      | HPLDPYLACL                | KLDGKLI 273  |              |               |                 |          |
| AtCAD5  | AGVTVYSPLSHF  | GFLK--QPGLRGG | ILGLGGVGHMGVK | IAKAMGHVTVISS  | SNKKREALQDLGAD      | DYVIGSDQAKMSELADS     | LDYVIDTVPVH      | HALEPYLL                  | LKLDGKLI 272 |              |               |                 |          |
| AtCAD6  | AGISMYSPMKYF  | GFLT--GPDKHVG | IVGLGLGHI     | GVRFKAFAGTKVT  | VSSSTTGKSKDALD      | TLGADGFLVSTDEDQ       | MKAAMGTM         | DGIIDTVSASH               | SISPLIGLLK   | SNGLKV 276   |               |                 |          |
| AtCAD7  | AGVTVYSPMKYH  | GLD--KPGMHIG  | VVLGLGLGHVAVK | FAKAMGKVT      | VISTSERK            | DEAVTRLGADAF          | LVSRDPKQMKDAMG   | TMDGIIDTVSATH             | PLPLGLGL     | KNKGKLV 271  |               |                 |          |
| AtCAD8  | AGITVYSPMKYH  | GLD--KPGMHIG  | VVLGLGLGHVAVK | FAKAMGKVT      | VISTSEK             | KEAEINRLGADAF         | LVSRDPKQIKDAMG   | TMDGIIDTVSATH             | PLPLGLGL     | KNKGKLV 271  |               |                 |          |
| AtCAD9  | AGITVYSPMKYYG | MT--EAGKHLG   | VAGLGLGHVAVK  | IGKAFGLKVT     | VISSSTKAE           | EAINHLAGDSF           | LVTTDPQKMKAAIG   | TMDYIIDTISAV              | HALYPL       | LGLLVN       | GKLI 275      |                 |          |
| AtqCAD1 | AGITVYTPMIRH  | RMN--QAGKSLG  | VIGLGLGLGHMAV | KFGKFSGLRVT    | VFTSASKD            | EALKLLGADEFV          | VSSDEKEMQSKANT   | LDFILDTASGDH              | PFDPYMSLLK   | VGGVMS 271   |               |                 |          |
| AtqCAD2 | AGITVYSPMKNF  | GFLN--EPGKHLG | VVLGLGLGHVAVK | FAKFGFMKVT     | VISSSPSKEKEA        | IERLGADSF             | IVSSNPQIQAA      | MGTM                      | DGIINTVSA    | AAHITPLIF    | LKPHGKMI 282  |                 |          |
| AtqCAD3 | AGITVYSPMKYF  | GFLN--RPLGLH  | VVLGLGLGHI    | IAVKFGKAFGMKVT | VISTSPNKE           | EAIERLGD              | DAFLVSHNEEQMKA   | AGISMDGIIDTVSAV           | HPVAPFID     | LKTHGKLI 272 |               |                 |          |
| AtqCAD4 | AGITVYSPMKYH  | GLN--VPGKHLG  | VVLGLGLGHVAVK | FAKAFGMKVT     | VISSSPNKE           | EAIEHFGADAF           | LVSRNTEQMKAAIG   | TMDGIIDTVSATH             | PLPLGLGL     | KNHGKMI 269  |               |                 |          |
| AtqCAD5 | AGVTVYSPLRH   | FGLT--DPGLRGG | ILGLGGVGHMGVK | IAKAMGHVTVISS  | SDKKRAEAMEHLGAD     | AYLVSSDEAQMATT        | LDSLDYIIDTVPVF   | HPLPEPYLL                 | LKLVN        | GKLI 272     |               |                 |          |
| AtqCAD6 | AGITVYSPMKQF  | GFLN--EPGKHLG | VVLGLGLGHVAVK | FAKAFGMKVT     | VISSSPSKEKEA        | IERLGADAF             | LSSNPEAMQAA      | MGTM                      | DGIINTVSAV   | HS           | LVPLIF        | LKLVH           | GKMI 283 |
| AtqCAD7 | AGITVYSPMIQ   | HKMN--QPGKSLG | VIGLGLGLGHMAV | KFGKAFGLKVT    | VFTSASKKEEAL        | KLLGAD                | EFVSSDEKQMQSLKNS | LDFIIDTASGDH              | PFDPYMSLLK   | TRGVL 272    |               |                 |          |
| ZmCAD1  | AGITVYPMKHH   | GLN--EAGKHIG  | VVLGLGLGHVAVK | FAKAFGMKVT     | VISTSPKKE           | EAMETL                | GADAFVSSGDANQ    | MKAAGTMDG                 | IMNTAS       | ASMSPYAL     | LKPKQGKMI 275 |                 |          |
| ZmCAD2  | AGITVYTPMRRH  | NMN--QPGKSLG  | VIGLGLGLGHMAV | KFGKAFGLKVT    | VFTSSEK             | KEAEINRLGAD           | NFVSSDTQ         | QMESL                     | KNSLHF       | IIDTASGDH    | PFDPYMSLLK    | VGGVMT 272      |          |
| ZmCAD3  | AGVTVYSPLKH   | FGLT--TPGLRGG | ILGLGGVGHMGVK | IAKAMGHVTVISS  | SSKKRAEAM           | DHLGAD                | AYLVSSDAAAMG     | PAADS                     | LDYIIDTVPV   | HPLPEPYL     | LKLDGKLV 272  |                 |          |
| ZmCAD4  | AGVTVYSPMRRH  | GLN--EPGKHLG  | VVLGLGLGHVAVK | FAKAFGMKVT     | VISTSAS             | KQEATENL              | GADFEFLSR        | DEDMQKAATG                | TMDGIIDTVSA  | WH           | ITPL          | LALLKPL         | QGMV 328 |
| TaCAD1  | AGVTVYSPLKH   | FGLM--TPGLRGG | ILGLGGVGHMGVK | IAKAMGHVTVISS  | SNKKRAEAM           | DDL                   | GADAYLVSSD       | TQMAAA                    | ADSLDYIIDTV  | PAKH         | PLPEPYL       | LALLKMDGKLV 273 |          |

|         | 340               | 360             | 380                                  | 400                         | 420                          |                          |                                     |                     |
|---------|-------------------|-----------------|--------------------------------------|-----------------------------|------------------------------|--------------------------|-------------------------------------|---------------------|
| AtCAD1  | LVGFPS-EIKISPA    | NLNLGMRMLAGS    | VTGGTKITQQMLDFCA                     | AHKIYPNIEVPIQK              | INEALERVVKDIKYRF             | VIDIKNSLK-----355        |                                     |                     |
| AtCAD2  | ALGLEKPLDLPTIFSLV | LGRKMVGGSQ      | IGGMKETQEMLEFCA                      | HKIVSDIELIKMSD              | INSAMDRLAKSDVRYR             | RFVIDVANSLPESSAE         | ILTEQVDHGVSITSRF376                 |                     |
| AtCAD3  | ALGLEKPLDLPTIFPLV | LGRKMVGGSQ      | IGGMKETQEMLEFCA                      | HKIVSDIELIKMSD              | INSAMDRLVKS                  | SDVRYR                   | RFVIDVANSLPESSAE                    | ILTEHVDHGVSITSRF375 |
| AtCAD4  | LMGVINTPLQFVTPLV  | LGRKVISGS       | FISIKETE                             | EVLAFC                      | KEKGLTSTIETVKID              | ELNIAFERLRKNDVRYR        | RFVVDVAGSNLVEEA                     | ATTTN-----365       |
| AtCAD5  | LMGVINNPLQFLTPLL  | MLGRKVITGS      | FISGMKETE                            | EMLEFCKEGLSSI               | IEVVKMDYVNTAFER              | LEKNDVRYRFVVDVEG         | SNLDA-----357                       |                     |
| AtCAD6  | LLGATEKPFDISA     | FSLILGRKSIAGS   | GIGGMKETQEMIDF                       | AAEHGKAEIEIIS               | MDYVNTAMDRLAKG               | DVRYRFVIDISNTLA          | ATRS-----363                        |                     |
| AtCAD7  | MVGAPAEPLPVFLIF   | LGRKMVGSMVGG    | IKETQEMVDLAGKHNITADIEL               | ISADYVNTAMERLAK             | ADVRYRFVIDVANTM              | KPTP-----357             |                                     |                     |
| AtCAD8  | MVGAPAEKPLEPVM    | PLIFERKMVMGSM   | IGGIKETQEMIDMAGKHNITADIEL            | ISADYVNTAMERLEK             | ADVRYRFVIDVANTL              | KPNPNL-----359           |                                     |                     |
| AtCAD9  | ALGLEKPLEPMPFLV   | LGRKMVGSDVGG    | MKETQEMLDFCAKHNITADIELIK             | MDEINTAMERLAKS              | DVRYRFVIDVANSL               | SPP-----360              |                                     |                     |
| AtqCAD1 | LVGFPS-EIKMHPG    | SLIYGARTISGS    | MTGGTKDTQEMLDFCA                     | ANKIYPDIEVPIQY              | INEALERLIKDKVRYR             | VIDIENSLK-----353        |                                     |                     |
| AtqCAD2 | LVGLPDKPFELPAYS   | LLGGKILAGS      | VMGGLKDTQEMIDFAGKHNITADIELI          | CMDDVNKAMERLAKG             | DVRYRFVIDVASS-----363        |                          |                                     |                     |
| AtqCAD3 | VVGGIAEPLSVPTIPL  | LLGRKLVAGSA     | IGGIKETQEMIEFAAKHNIMADIEV            | IPIDYISTAMERLAKG            | DVRYRFVIDVANTL-----354       |                          |                                     |                     |
| AtqCAD4 | NVGLPTKPM         | EVPAFSLIQGGRT   | LAGSVVGGMRDTQEMIDFAGKHNITAE          | VEVVSMDYVNTAFERLAKG         | DVRYRFVIDVANSLTPA-----354    |                          |                                     |                     |
| AtqCAD5 | MMGVINQPMQFITP    | MVLMGRKKTITGS   | FISGMDTEQ                            | EVLEFCEKGLTSMIEMVKMDQVNEA   | LERLERN                      | DVRYRFVVDVAGSNLD-----356 |                                     |                     |
| AtqCAD6 | MVGAPAEKPFELPV    | FLIMAGKVL       | AGSCTGGMKDTQEMIDFAGKHNVTADIEL        | INMDYVNKAMERLAK             | ADVRYRFVIDVANSLIAADQ-----370 |                          |                                     |                     |
| AtqCAD7 | LVGAPS-EVKVEPR    | SLIHGARTISGS    | ATGGTKDTQEMLDFCA                     | AKKIYPEIEVPIQY              | INEALERMIKRDVRYR             | VIDIENSLK-----354        |                                     |                     |
| ZmCAD1  | LLGLEKPLQISAFSL   | VTGGKTL         | AGSCMGSIRDTQEMMDFAAKHGLAADIEL        | IGTEEVNEAMERLAKG            | EVRYRFVIDIGNTLNAAS           | LGSSPVPAL-----370        |                                     |                     |
| ZmCAD2  | LVGFPS-EIKMHP     | ASLILGARTLSGS   | VVGGIKDIQEMVNFCAANNIYPEIEI           | IKIDYINEALARLVN             | RDVKYRFVIDIENS               | FK-----354               |                                     |                     |
| ZmCAD3  | LLGVIGEPLSFVSP    | MVLGRKAITGS     | FIGSIDETA                            | EVLFQ                       | CDKGLTSQIEVVKMGYVNEA         | LERLERN                  | DVRYRFVVDVAGSNVEAEAAAADAASN-----367 |                     |
| ZmCAD4  | VVGAPSKPLEPAY     | IVPGGKGVAGNNVGS | VRDCQAMLEFAGKHGIGAEVEIKMDYVNTAMERLAK | NDVRYRFVIDVAGSLGSAA-----414 |                              |                          |                                     |                     |
| TaCAD1  | LMGVIAEPLSFVSP    | MVLGRKKTITGS    | FISGMDETE                            | EVLFQ                       | CDKGLTSQIEVVKMDYVNTAFER      | LERLERN                  | DVRYRFVVDVGGSNIEDAA-----360         |                     |

**Figure S4.** Protein alignment for AtqCAD. Residues that compose the substrate-binding pocket of CAD proteins are highlight in color.

**Table S1.** Expression levels of genes involved in cellulose biosynthesis in *Agave tequilana* in several organs and tissues sampled. Values shown are transcripts per million (TPM).

| Gene name    | Root       | Pine       | Leaves     | Shoot apical meristem | Anther     | Ovary      | Tepal      | Pistil     |
|--------------|------------|------------|------------|-----------------------|------------|------------|------------|------------|
| <i>SPS1</i>  | 0          | 45.2085807 | 0          | 33.3521462            | 42.7731031 | 33.9497662 | 53.4816066 | 65.6248299 |
| <i>SPS2</i>  | 19.9594525 | 62.7254275 | 468.275016 | 29.4269683            | 185.443037 | 290.997996 | 356.030153 | 426.843449 |
| <i>SPP1</i>  | 230.695629 | 100.550917 | 151.241681 | 122.924041            | 76.4881824 | 146.36058  | 113.69358  | 142.560071 |
| <i>SPP2</i>  | 13.1874954 | 17.3677454 | 7.38183532 | 22.1081965            | 18.0150436 | 14.8979562 | 26.4107889 | 22.9780923 |
| <i>FK1</i>   | 23.5236405 | 8.74042843 | 13.0076393 | 2.84777113            | 3.63613798 | 0.57058431 | 30.6841143 | 18.8036762 |
| <i>FK2</i>   | 4.72611322 | 1.39332712 | 1.39367564 | 11.215472             | 4.4562891  | 0          | 0.48177287 | 4.70091905 |
| <i>FK3</i>   | 126.885091 | 26.7354281 | 456.661052 | 68.3465071            | 50.097901  | 11.4116861 | 32.2787825 | 20.6840438 |
| <i>FK4</i>   | 39.2060674 | 34.9617137 | 97.5572949 | 34.647882             | 48.0778243 | 49.0702503 | 69.3752936 | 78.5053481 |
| <i>FK5</i>   | 81.0781475 | 53.275482  | 1.99760175 | 21.7712103            | 13.3890681 | 6.52748446 | 2.69311036 | 9.87663091 |
| <i>GPI1</i>  | 146.131706 | 106.42757  | 83.6205385 | 140.015414            | 49.2898703 | 79.8818028 | 76.1201139 | 105.770679 |
| <i>PGM1</i>  | 4.27702554 | 10.8175655 | 71.5373707 | 19.3885751            | 23.5056119 | 25.1456503 | 33.5843869 | 38.035136  |
| <i>PGM2</i>  | 253.770182 | 251.929996 | 757.230432 | 234.466489            | 331.292571 | 297.845007 | 616.187504 | 688.214548 |
| <i>SUS1</i>  | 17.3504669 | 9.56305699 | 1.20320664 | 35.9009013            | 7.13895089 | 42.2403561 | 9.51501423 | 25.0417958 |
| <i>SUS2</i>  | 328.354379 | 235.17408  | 484.441653 | 30.1294185            | 1185.68399 | 2065.28695 | 2812.84055 | 4266.17805 |
| <i>SUS3</i>  | 90.5303739 | 179.949997 | 15.3304321 | 179.409581            | 5.65621463 | 18.8292821 | 5.2995016  | 8.93174619 |
| <i>HXK1</i>  | 4.27702554 | 5.85094562 | 2.81987038 | 6.9960244             | 109.544717 | 5.34637494 | 8.4695671  | 4.05689314 |
| <i>HXK2</i>  | 7.16401778 | 12.1337712 | 0.95234502 | 11.732817             | 0.92115495 | 4.10250116 | 6.8604457  | 8.07617892 |
| <i>UGP1</i>  | 335.033667 | 344.475709 | 957.919725 | 264.368086            | 270.286256 | 516.949381 | 660.028835 | 841.464509 |
| <i>UGP2</i>  | 7.49192307 | 11.5219412 | 3.25190983 | 18.1450484            | 52.1179776 | 7.29777327 | 7.22659309 | 24.0310982 |
| <i>UGP3</i>  | 0          | 0          | 6.77326362 | 2.8240397             | 0          | 0          | 0          | 1.11881873 |
| <i>CESA1</i> | 550.039741 | 265.667893 | 369.630654 | 286.699358            | 243.811132 | 190.854744 | 244.114315 | 732.788663 |
| <i>CESA3</i> | 424.159751 | 230.09949  | 232.990048 | 339.065123            | 116.126126 | 53.4922786 | 130.179848 | 442.041521 |
| <i>CESA4</i> | 223.118166 | 173.26614  | 229.491922 | 164.696097            | 1030.23909 | 87.8699831 | 187.89142  | 286.756062 |
| <i>CESA5</i> | 125.26695  | 2.00001568 | 65.7303889 | 1.42863185            | 2.02007665 | 0          | 0          | 1.88036762 |
| <i>CESA7</i> | 88.2920639 | 3.3573528  | 69.9857452 | 0                     | 0          | 0          | 0          | 0.75684797 |
| <i>CESA8</i> | 201.597599 | 169.404927 | 111.865698 | 91.1998703            | 59.9558751 | 104.610927 | 76.1586557 | 125.664968 |

**Table S2.** Expression levels of genes involved in lignin biosynthesis in *Agave tequilana* in several organs and tissues sampled. Values shown are transcripts per million (TPM).

| Gene name      | Root       | Pine       | Leave      | Shoot apical meristem | Anther     | Ovary      | Tepal      | Pistil     |
|----------------|------------|------------|------------|-----------------------|------------|------------|------------|------------|
| <i>PAL1</i>    | 203.728983 | 15.0746683 | 28.2358685 | 9.00844933            | 4.18155867 | 9.60863971 | 17.7003353 | 30.3444324 |
| <i>PAL2</i>    | 67.9761926 | 12.8175812 | 1.8535886  | 7.22859238            | 204.302472 | 78.6493407 | 185.72826  | 306.546931 |
| <i>C4H</i>     | 353.595958 | 18.1698083 | 54.4787808 | 7.07196497            | 35.2260967 | 27.8102791 | 67.2362221 | 133.181737 |
| <i>4CL</i>     | 58.4526824 | 34.9617137 | 5.57470257 | 18.0358838            | 90.9034494 | 13.6940233 | 66.9664293 | 157.010696 |
| <i>CSE</i>     | 44.6236331 | 18.0721211 | 10.9821641 | 3.9156853             | 12.2901464 | 12.9237345 | 25.697765  | 11.1834864 |
| <i>HCT1</i>    | 88.5486854 | 25.7688396 | 16.3663976 | 0.8353462             | 2.25036539 | 12.3873853 | 35.8439017 | 6.13469935 |
| <i>HCT2</i>    | 3.11510027 | 0          | 0          | 0                     | 0          | 0          | 0          | 0          |
| <i>C3H</i>     | 164.665483 | 24.6788567 | 19.0469004 | 14.7134842            | 23.4328892 | 7.98818028 | 30.8334638 | 29.1456981 |
| <i>CcoAOMT</i> | 368.216257 | 15.851024  | 40.8579242 | 6.78718785            | 0          | 6.1623105  | 7.72281915 | 14.7843904 |
| <i>CCR1</i>    | 9.3453008  | 0          | 0.24621603 | 0                     | 0          | 0          | 0          | 0          |
| <i>CCR2</i>    | 110.489826 | 56.5557134 | 27.4089543 | 21.3582835            | 11.3124293 | 7.41759597 | 31.7970096 | 13.6326652 |
| <i>F5H</i>     | 112.628339 | 20.5657139 | 106.383907 | 0.94925704            | 37.3835385 | 2.85292153 | 25.4906027 | 10.6804881 |
| <i>COMT1</i>   | 409.468168 | 152.278829 | 227.917069 | 52.270839             | 42.0781967 | 54.6905057 | 76.0671188 | 98.31032   |
| <i>COMT2</i>   | 0          | 0.51414285 | 449.228115 | 34.647882             | 122.820661 | 82.16414   | 178.255963 | 314.961576 |
| <i>CAD1</i>    | 45.2794437 | 32.0362409 | 33.5550639 | 31.235303             | 48.2232699 | 20.5125058 | 60.4817664 | 39.0035253 |
| <i>CAD2</i>    | 0.71283759 | 2.57071424 | 6.96837821 | 36.0717676            | 0.80803066 | 18.2586978 | 1.44531862 | 8.93174619 |
| <i>CAD3</i>    | 57.7398448 | 11.7070327 | 4.64558547 | 17.5517627            | 30.0587406 | 26.5207585 | 264.878725 | 75.1676955 |
| <i>CAD4</i>    | 3.56418795 | 3.74810137 | 42.8694628 | 5.22091373            | 0.80803066 | 1.71175292 | 6.8267216  | 2.35045952 |
| <i>CAD5</i>    | 137.313905 | 74.9825931 | 58.1906036 | 27.0016166            | 0          | 15.9478313 | 12.9596903 | 5.83854145 |
| <i>CAD6</i>    | 0          | 1.6606814  | 0          | 9.97669152            | 4.2825625  | 48.2257855 | 3.46876468 | 2.86756062 |
| <i>CAD7</i>    | 34.9290419 | 0.51414285 | 18.5823419 | 0.47462852            | 12.9284906 | 5.13525875 | 24.0886436 | 21.6242276 |

**Table S3.** Percentages of identity/similarity between amino acid sequences of orthologous CESA genes of *A. tequilana* (AtqCESA), *A. officinalis* (AoCESA), and *A. thaliana* (AtCESA)

|                 | AtqCESA1 | AtqCESA3 | AtqCESA4 | AtqCESA5 | AtqCESA7 | AtqCESA8 |
|-----------------|----------|----------|----------|----------|----------|----------|
| <b>AoCESA1</b>  | 93/96    | 66/74    | 61/71    | 65/75    | 61/72    | 56/67    |
| <b>AoCESA2</b>  | 58/67    | 58/68    | 62/72    | 58/68    | 56/67    | 85/89    |
| <b>AoCESA3</b>  | 50/55    | 58/60    | 49/54    | 48/54    | 48/53    | 47/54    |
| <b>AoCESA4</b>  | 60/71    | 61/71    | 91/94    | 64/74    | 62/73    | 61/72    |
| <b>AoCESA5</b>  | 60/71    | 58/68    | 60/71    | 70/80    | 59/72    | 53/66    |
| <b>AoCESA6</b>  | 67/75    | 63/72    | 63/73    | 90/93    | 68/78    | 56/67    |
| <b>AoCESA7</b>  | 63/72    | 65/72    | 63/72    | 68/77    | 77/85    | 57/67    |
| <b>AoCESA8</b>  | 67/76    | 62/71    | 64/73    | 92/95    | 68/78    | 56/67    |
| <b>AoCESA9</b>  | 65/74    | 61/70    | 63/72    | 90/93    | 67/77    | 55/66    |
| <b>AoCESA10</b> | 78/80    | 52/59    | 47/56    | 53/61    | 48/57    | 45/53    |
| <b>AoCESA11</b> | 47/60    | 48/60    | 45/59    | 46/58    | 53/63    | 44/57    |
| <b>AoCESA12</b> | 69/77    | 81/86    | 61/70    | 63/74    | 61/71    | 57/68    |
| <b>AtCESA1</b>  | 82/89    | 64/74    | 60/71    | 64/74    | 60/72    | 56/66    |
| <b>AtCESA2</b>  | 61/73    | 60/70    | 61/73    | 71/82    | 61/74    | 54/67    |
| <b>AtCESA3</b>  | 69/78    | 77/84    | 61/69    | 63/72    | 61/72    | 57/68    |
| <b>AtCESA4</b>  | 58/70    | 61/71    | 77/84    | 60/71    | 58/70    | 60/71    |
| <b>AtCESA5</b>  | 62/72    | 60/70    | 62/73    | 70/81    | 60/75    | 55/68    |
| <b>AtCESA6</b>  | 61/72    | 59/69    | 62/73    | 71/82    | 60/74    | 54/67    |
| <b>AtCESA7</b>  | 62/71    | 63/72    | 64/73    | 66/76    | 73/83    | 56/67    |
| <b>AtCESA8</b>  | 57/67    | 57/67    | 62/71    | 57/67    | 56/67    | 84/90    |
| <b>AtCESA9</b>  | 61/72    | 59/69    | 60/71    | 71/80    | 60/73    | 55/66    |
| <b>AtCESA10</b> | 76/84    | 63/73    | 57/69    | 61/72    | 57/69    | 54/66    |

**Table S4.** Percentages of identity/similarity between amino acid sequences of orthologous CAD genes of *A. tequilana* (AtqCAD), *O. sativa* (OsCAD), and *A. thaliana* (AtCAD)

|                | AtqCAD1 | AtqCAD2 | AtqCAD3 | AtqCAD4 | AtqCAD5 | AtqCAD6 | AtqCAD7 |
|----------------|---------|---------|---------|---------|---------|---------|---------|
| <b>OsCAD1</b>  | 72/84   | 51/64   | 52/66   | 49/65   | 45/63   | 49/64   | 72/82   |
| <b>OsCAD2</b>  | 41/60   | 45/62   | 48/65   | 48/65   | 80/88   | 45/62   | 42/59   |
| <b>OsCAD3</b>  | 51/64   | 65/77   | 58/73   | 61/75   | 45/62   | 67/78   | 50/65   |
| <b>OsCAD4</b>  | 69/79   | 47/62   | 48/63   | 45/62   | 41/58   | 47/62   | 70/80   |
| <b>OsCAD5</b>  | 46/59   | 62/72   | 54/67   | 60/71   | 43/57   | 65/75   | 46/60   |
| <b>OsCAD6</b>  | 49/64   | 54/69   | 54/70   | 56/69   | 48/64   | 56/69   | 50/64   |
| <b>OsCAD7</b>  | 44/59   | 61/75   | 54/69   | 54/69   | 42/59   | 62/76   | 42/60   |
| <b>OsCAD8A</b> | 46/61   | 55/70   | 56/71   | 61/73   | 48/62   | 59/71   | 47/64   |
| <b>OsCAD8B</b> | 40/52   | 50/61   | 47/59   | 53/63   | 40/52   | 51/63   | 39/52   |
| <b>OsCAD8C</b> | 40/52   | 49/60   | 47/59   | 52/64   | 40/52   | 50/62   | 39/52   |
| <b>OsCAD8D</b> | 45/60   | 55/70   | 55/70   | 61/73   | 48/61   | 58/71   | 45/62   |
| <b>OsCAD9</b>  | 45/61   | 54/72   | 56/71   | 59/75   | 46/66   | 58/73   | 45/62   |
| <b>AtCAD1</b>  | 71/81   | 48/64   | 50/66   | 45/63   | 41/59   | 46/63   | 71/81   |
| <b>AtCAD2</b>  | 47/60   | 56/70   | 55/69   | 53/70   | 45/62   | 57/70   | 45/59   |
| <b>AtCAD3</b>  | 46/60   | 55/69   | 55/69   | 52/69   | 45/62   | 56/70   | 45/58   |
| <b>AtCAD4</b>  | 43/61   | 45/63   | 48/66   | 46/63   | 73/82   | 46/63   | 45/59   |
| <b>AtCAD5</b>  | 44/62   | 45/63   | 51/67   | 48/65   | 75/83   | 47/64   | 46/62   |
| <b>AtCAD6</b>  | 46/61   | 59/75   | 60/76   | 58/76   | 47/65   | 60/76   | 48/64   |
| <b>AtCAD7</b>  | 47/62   | 59/72   | 60/74   | 63/77   | 47/62   | 62/74   | 48/64   |
| <b>AtCAD8</b>  | 46/60   | 60/73   | 61/74   | 60/75   | 48/63   | 64/74   | 47/61   |
| <b>AtCAD9</b>  | 49/64   | 62/77   | 60/75   | 60/74   | 48/65   | 65/77   | 47/62   |



**Table S5.** cDNA libraries used in this study, previously reported by Gross et al., 2013 and deposited in Genbank (SRP019885)

| cDNA library name | Read length (pb) | Tissue or organ sequenced |
|-------------------|------------------|---------------------------|
| SRX253025         | 500              | Juvenil leaf              |
| SRX253024         | 250              | Juvenil leaf              |
| SRX253023         | 500              | Roots                     |
| SRX253022         | 250              | Roots                     |
| SRX253021         | 500              | Stem apical meristem      |
| SRX253020         | 250              | Stem apical meristem      |
| SRX253019         | 500              | Adult leaf                |
| SRX253018         | 250              | Adult leaf                |



**Table S6.** Gene-specific oligonucleotides used for qPCR analysis

| Gene name | Sequence (5'-3')                                   |
|-----------|----------------------------------------------------|
| AtqSUS2   | F: GAATGCTGCAACGCCATCAA<br>R: CTTAGAGCTGCCATCTGCGA |
| AtqCESA1  | F: GTGCCAGATCTGTGGTGACA<br>R: CTGGTCAGACGTGGGATACG |
| AtqCESA7  | F: GGCCCCGAGGATGTTGATAG<br>R: GGGACGACGAAGAGAAGTCG |
| AtqCCR2   | F: GCCCATTTGGTGGTCTACGA<br>R: GTACGCCCAGGTCTCTTAGC |
| AtqCD5    | F: TGTGTTCCATCCCTTGGAGC<br>R: CGAGATTGCTTCCAGCAACG |
| AtqGAPDH  | F: ACACTGTCCACGGTTCATGG<br>R: TCCACAACGTACTCAGCACC |

F= Forward; R= Reverse
